# Supplementary material for: Direct hydroxylation of benzene to phenol using H2O2 as an oxidant over vanadium-containing nitrogen doped mesoporous carbon catalysts
Source: Royal Society of Chemistry journal article supplement (doi:10.1039/c6ra18132e), 2016-01-01
Supplement: c6ra18132e1.pdf [file c6ra18132e1.pdf]

**Supplementary Information**

**Direct hydroxylation of benzene to phenol using H<sub>2</sub>O<sub>2</sub> as an oxidant over vanadium-containing nitrogen doped mesoporous carbon catalysts†**

Liya Hu, Cheng Wang, Bin Yue,\* Xueying Chen and Heyong He\*

Department of Chemistry and Shanghai Key Laboratory of Molecular Catalysis and Innovative Materials, Collaborative Innovation Center of Chemistry for Energy Materials, Fudan University, Shanghai 200433, China.

E-mail addresses: yuebin@fudan.edu.cn (B. Yue), heyonghe@fudan.edu.cn (H. He); Tel.: +86 21 65643916.

**Table S1** Optimization of various reaction conditions over 4.2V/NC-600 catalyst.

| Entry | Catalyst amount (g) | nH <sub>2</sub> O <sub>2</sub> : nbenzene | Temperature (°C) | Time (h) | Solvent           | Benzene conversion (%) | Phenol selectivity (%) | Phenol yield (%) |
|-------|---------------------|-------------------------------------------|------------------|----------|-------------------|------------------------|------------------------|------------------|
| 1     | 0.02                | 3                                         | 70               | 1        | 80 % acetic acid  | 21.6                   | 92.5                   | 20.0             |
| 2     | 0.02                | 3                                         | 70               | 2        | 80 % acetic acid  | 29.3                   | 94.0                   | 27.5             |
| 3     | 0.02                | 3                                         | 70               | 3        | 80 % acetic acid  | 31.0                   | 97.2                   | 30.1             |
| 4     | 0.02                | 3                                         | 70               | 4        | 80 % acetic acid  | 29.3                   | 96.9                   | 28.4             |
| 5     | 0.02                | 3                                         | 50               | 3        | 80 % acetic acid  | 14.4                   | 90.0                   | 13.0             |
| 6     | 0.02                | 3                                         | 60               | 3        | 80 % acetic acid  | 21.8                   | 92.6                   | 20.2             |
| 7     | 0.02                | 3                                         | 80               | 3        | 80 % acetic acid  | 30.5                   | 96.3                   | 29.4             |
| 8     | 0.01                | 3                                         | 70               | 3        | 80 % acetic acid  | 27.0                   | 96.5                   | 26.1             |
| 9     | 0.03                | 3                                         | 70               | 3        | 80 % acetic acid  | 26.8                   | 98.1                   | 26.3             |
| 10    | 0.02                | 1                                         | 70               | 3        | 80 % acetic acid  | 11.1                   | 98.5                   | 10.9             |
| 11    | 0.02                | 2                                         | 70               | 3        | 80 % acetic acid  | 20.5                   | 98.1                   | 20.1             |
| 12    | 0.02                | 4                                         | 70               | 3        | 80 % acetic acid  | 32.4                   | 94.1                   | 30.5             |
| 13    | 0.02                | 3                                         | 70               | 3        | 100 % acetic acid | 17.7                   | 98.3                   | 17.4             |
| 14    | 0.02                | 3                                         | 70               | 3        | 90 % acetic acid  | 23.4                   | 98.2                   | 23.0             |
| 15    | 0.02                | 3                                         | 70               | 3        | 70 % acetic acid  | 29.4                   | 94.2                   | 27.7             |
| 16    | 0.02                | 3                                         | 70               | 3        | acetone           | 3.2                    | 99.3                   | 3.2              |
| 17    | 0.02                | 3                                         | 70               | 3        | acetonitrile      | 24.3                   | 94.2                   | 22.9             |

Reaction conditions: 0.4 mL of benzene, 5 mL of solvent, 30 wt% H<sub>2</sub>O<sub>2</sub> as the oxidant.

The optimum reaction conditions: 0.02 g of catalyst amount, 70 °C of reaction temperature, 3 h of reaction time, 3 to 1 of H<sub>2</sub>O<sub>2</sub> to benzene molar ratio, and 80 wt% of acetic acid solvent.

**Table S2** Carbon balance closure.

| Catalysts                       | Carbon in<br>(mmol) | Carbon out (mmol) |        |                         | Carbon balance<br>closure (%) <sup>b</sup> |
|---------------------------------|---------------------|-------------------|--------|-------------------------|--------------------------------------------|
|                                 |                     | Unreacted benzene | Phenol | Byproducts <sup>a</sup> |                                            |
| - <sup>c</sup>                  | 27.0                | 27.0              | 0      | 0                       | >99                                        |
| NH <sub>4</sub> VO <sub>3</sub> | 27.0                | 24.3              | 2.2    | 0.5                     | >99                                        |
| 1.4V/NC-400                     | 27.0                | 23.9              | 2.6    | 0.5                     | >99                                        |
| 1.4V/NC-500                     | 27.0                | 22.5              | 4.0    | 0.5                     | >99                                        |
| 1.4V/NC-600                     | 27.0                | 21.4              | 5.1    | 0.5                     | >99                                        |
| 1.4V/NC-700                     | 27.0                | 23.5              | 3.2    | 0.3                     | >99                                        |
| 2.8V/NC-600                     | 27.0                | 19.6              | 6.9    | 0.5                     | >99                                        |
| 4.2V/NC-600                     | 27.0                | 18.6              | 8.1    | 0.2                     | >99                                        |
| 5.6V/NC-600                     | 27.0                | 20.5              | 6.3    | 0.2                     | >99                                        |
| 4.2V/C-hexa                     | 27.0                | 19.5              | 7.2    | 0.2                     | >99                                        |
| NC-600                          | 27.0                | 27.0              | -      | -                       | >99                                        |
| C-hexa                          | 27.0                | 27.0              | 0      | 0                       | >99                                        |

<sup>a</sup> The total amount of hydroquinone and catechol.

<sup>b</sup> The carbon balance closure was calculated as the molar ratio of carbon out to carbon in.

<sup>c</sup> The blank experiment without any catalyst.

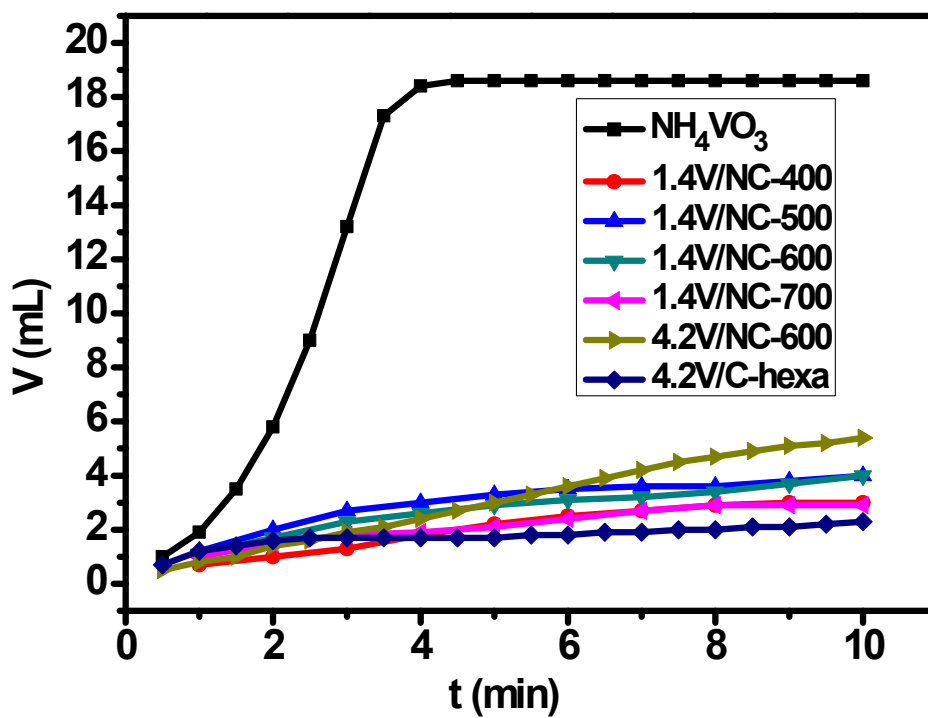

**Fig. S1.** Released oxygen volume as a function of reaction time.

Reaction conditions: 0.01 g catalyst, 5 mL of 80 wt% acetic acid, 0.2 mL of 30 wt% H<sub>2</sub>O<sub>2</sub>, 70 °C.
